# Supplementary material for: Emerging Concepts in the Paramedicine Literature to Inform the Revision of a pan-Canadian Competency Framework for Paramedics: A Restricted Review
Source: Preprints.org preprint supplement (doi:10.20944/preprints202212.0169.v1), 2022-12-09
Supplement: Supplementary file 1 [file supplementary]

Emerging concepts in the paramedicine literature to inform the revision of a pan-Canadian competency framework for paramedics: a restricted review

## Appendix 1. Included Literature

| Author, year | Title                                                                                                                                                                                                                                                           | Peer reviewed | Emerging concepts                                 |                        |
|--------------|-----------------------------------------------------------------------------------------------------------------------------------------------------------------------------------------------------------------------------------------------------------------|---------------|---------------------------------------------------|------------------------|
| Adsten 2017  | A Timeline of The Evolution of EMS and Paramedicine in Saskatchewan.                                                                                                                                                                                            | No            | Complex adaptive systems                          |                        |
| Adsten 2017  | Development Of EMS Technology in Canada.                                                                                                                                                                                                                        | No            | Evidence informed practice and systems            |                        |
| Agarwal 2015 | Rationale And Methods of a Multicenter Randomized Controlled Trial of The Effectiveness of a Community Health Assessment Programme with Emergency Medical Services (Chap-EMS) Implemented on Residents Aged 55 Years and Older in Subsidised Seniors' Housing B | Yes           | Social responsiveness, justice, equity and access |                        |
| Agarwal 2017 | Effectiveness Of a Community Paramedic-Led Health Assessment and Education Initiative in A Seniors' Residence Building: The Community Health Assessment Program Through Emergency Medical Services (Chap-EMS).                                                  | Yes           | Social responsiveness, justice, equity and access |                        |
| Agarwal 2018 | Evaluation Of a Community Paramedicine Health Promotion and Lifestyle Risk Assessment Program for Older Adults Who Live in Social Housing: A Cluster Randomized Trial.                                                                                          | Yes           | Social responsiveness, justice, equity and access |                        |
| Agarwal 2019 | Rationale And Methods of An Evaluation of The Effectiveness of The Community Paramedicine at Home (Cp@Home) Program for Frequent Users of Emergency Medical Services in Multiple Ontario Regions: A Study Protocol for A Randomized Controlled Trial.           | Yes           | Social responsiveness, justice, equity and access |                        |
| Agarwal 2019 | Reducing 9-1-1 Emergency Medical Service Calls by Implementing a Community Paramedicine Program for Vulnerable Older Adults in Public Housing in Canada: A Multi-Site Cluster Randomized Controlled Trial.                                                      | Yes           | Social responsiveness, justice, equity and access |                        |
| Agarwal 2019 | Social Factors in Frequent Callers: A Description of Isolation, Poverty and Quality of Life in Those Calling Emergency Medical Services Frequently.                                                                                                             | Yes           | Social responsiveness, justice, equity and access |                        |
| Agarwal 2020 | Cost-Effectiveness Analysis of a Community Paramedicine Programme for Low-Income Seniors Living                                                                                                                                                                 | Yes           | Evidence informed practice and systems            | Social responsiveness, |

Emerging concepts in the paramedicine literature to inform the revision of a pan-Canadian competency framework for paramedics: a restricted review

|                |                                                                                                                                             |     |                                                   |                                                   |
|----------------|---------------------------------------------------------------------------------------------------------------------------------------------|-----|---------------------------------------------------|---------------------------------------------------|
|                | in Subsidised Housing: The Community Paramedicine at Clinic Programme (Cp@Clinic).                                                          |     |                                                   | justice, equity and access                        |
| Agarwal 2020   | Feasibility Of Implementing a Community Cardiovascular Health Promotion Program with Paramedics and Volunteers in A South Asian Population. | Yes | Social responsiveness, justice, equity and access |                                                   |
| Allana 2021    | Paramedics Have Untapped Potential to Address Social Determinants of Health in Canada.                                                      | No  | Social responsiveness, justice, equity and access |                                                   |
| Angehrn 2020   | Sleep Quality and Mental Disorder Symptoms Among Canadian Public Safety Personnel.                                                          | Yes | Healthy Professionals                             |                                                   |
| Armour 2021    | Paramedic-Delivered Teleconsultations: A Grounded Theory Study                                                                              | Yes | Virtual Care                                      |                                                   |
| Armstrong 2019 | Evaluating The Effect of a Strength and Conditioning Program to Improve Paramedic Candidates' Physical Readiness for Duty.                  | Yes | Healthy Professionals                             |                                                   |
| Armstrong 2019 | The Ottawa Paramedic Physical Ability Test: Test-Retest Reliability and Analysis of Sex-Based Performance Differences                       | Yes | Healthy Professionals                             |                                                   |
| Ashton 2015    | Economic Preservation: A Case for Community Paramedicine in Rural and Urban Canada.                                                         | No  | Evidence informed practice and systems            | Social responsiveness, justice, equity and access |
| Ashton 2017    | Health in the North: The Potential for Community Paramedicine in Remote and/or Isolated Indigenous Communities                              | No  | Social responsiveness, justice, equity and access |                                                   |
| Ashton 2019    | Health Service Needs in the North: A Case Study on CSA Standard for Community Paramedicine                                                  | No  | Social responsiveness, justice, equity and access |                                                   |
| Bang 2019      | The Rural-Urban Gap: Differences in Injury Characteristics.                                                                                 | Yes | Adaptive expertise                                |                                                   |
| Bank 2015      | Standards For Paramedic Services - What's Next?                                                                                             | No  | Complex adaptive systems                          |                                                   |
| Bassil 2011    | The Relationship Between Temperature and Ambulance Response Calls for Heat-Related Illness in Toronto, Ontario, 2005.                       | Yes | Planetary Health                                  |                                                   |
| Batt 2015      | Rethinking 'Remote and Rural' Education.                                                                                                    | No  | Social responsiveness, justice, equity and access | Learning environment                              |

Emerging concepts in the paramedicine literature to inform the revision of a pan-Canadian competency framework for paramedics: a restricted review

|                 |                                                                                                                                         |     |                                                   |                                                   |
|-----------------|-----------------------------------------------------------------------------------------------------------------------------------------|-----|---------------------------------------------------|---------------------------------------------------|
| Batt 2016       | Enhancing Patient Safety Education for Paramedics with the IHI Open School                                                              | No  | Learning environment                              | Complex adaptive systems                          |
| Batt 2016       | Student Paramedic Research at Fanshawe College                                                                                          | No  | Learning environment                              |                                                   |
| Batt 2016       | Do Paramedics Have a Role to Play in Organ Donation                                                                                     | Yes | Complex adaptive systems                          |                                                   |
| Batt 2019       | The Students Are Our Future: Growing the next Generation of Paramedic Researchers in Canada                                             | No  | Learning environment                              |                                                   |
| Batt 2021       | Advances in Community Paramedicine in Response to COVID-19                                                                              | No  | Social responsiveness, justice, equity and access | Complex adaptive systems                          |
| Batt 2022       | Developing the National Occupational Standard for Paramedics: Update 1                                                                  | No  | Learning environment                              |                                                   |
| Becker 2021     | Driving The Ambulance: An Essential Component of Emergency Medical Services: An Integrative Review.                                     | Yes | Learning environment                              |                                                   |
| Bennett 2020    | Non-Technical Skills in Paramedicine: A Scoping Review                                                                                  | Yes | Healthy Professionals                             | Learning environment                              |
| Bigham 2012     | Patient Safety in Emergency Medical Services: A Systematic Review of The Literature.                                                    | Yes | Clinical reasoning                                |                                                   |
| Bigham 2013     | Expanding Paramedic Scope of Practice in The Community: A Systematic Review of The Literature.                                          | Yes | Complex adaptive systems                          |                                                   |
| Bigham 2014     | Paramedic Self-Reported Exposure to Violence in The Emergency Medical Services (Ems) Workplace: A Mixed-Methods Cross-Sectional Survey. | Yes | Healthy Professionals                             |                                                   |
| Bigham 2015     | Spotlight On Science. Studying Our Wrongs, The Right Way: Patient Safety Research in Canada.                                            | No  | Clinical reasoning                                |                                                   |
| Billingham 2017 | Rural And Remote Paramedicine -- Our Dirty Little Secret.                                                                               | No  | Complex adaptive systems                          | Social responsiveness, justice, equity and access |
| Bischoff 2021   | Impact Of Prepatching on Paramedic In-Hospital Times for Emergent Interfacility Transfers                                               | Yes | Evidence informed practice and systems            |                                                   |
| Blanchard 2011  | Carbon Footprinting Of North American Emergency Medical Services Systems.                                                               | Yes | Planetary Health                                  |                                                   |
| Blanchard 2012  | Emergency Medical Services Response Time and Mortality in An Urban Setting                                                              | Yes | Complex adaptive systems                          |                                                   |

Emerging concepts in the paramedicine literature to inform the revision of a pan-Canadian competency framework for paramedics: a restricted review

|                |                                                                                                                                                                                              |     |                                                   |                                        |
|----------------|----------------------------------------------------------------------------------------------------------------------------------------------------------------------------------------------|-----|---------------------------------------------------|----------------------------------------|
| Blanchard 2019 | Community Paramedic Point of Care Testing: Validity and Usability of Two Commercially Available Devices.                                                                                     | Yes | Evidence informed practice and systems            |                                        |
| Blanchard 2021 | Linkage Of Emergency Medical Services and Hospital Data: A Necessary Precursor to Improve Understanding of Outcomes of Prehospital Care                                                      | Yes | Evidence informed practice and systems            |                                        |
| Boechler 2021  | Impactful Approaches to Leadership on The Front Lines of The Covid-19 Pandemic: Lived Experiences of Canadian Paramedics.                                                                    | Yes | Adaptive expertise                                | Complex adaptive systems               |
| Bolduc 2018    | Comparison Of Electronic Versus Manual Mass-Casualty Incident Triage.                                                                                                                        | Yes | Evidence informed practice and systems            |                                        |
| Boutilier 2017 | Optimizing A Drone Network to Deliver Automated External Defibrillators                                                                                                                      | Yes | Evidence informed practice and systems            |                                        |
| Bowles 2014    | Excellence In Paramedic Education.                                                                                                                                                           | No  | Learning environment                              |                                        |
| Bowles 2017    | Four Dimensions of Paramedic Practice in Canada: Defining and Describing the Profession                                                                                                      | Yes | Adaptive expertise                                |                                        |
| Bowles 2019    | The Problems on Your Desk: A Research Study to Define and Describe Paramedic Practice in Canada.                                                                                             | Yes | Adaptive expertise                                |                                        |
| Brooks 2013    | Determining Risk for Out-Of-Hospital Cardiac Arrest by Location Type in A Canadian Urban Setting to Guide Future Public Access Defibrillator Placement.                                      | Yes | Evidence informed practice and systems            |                                        |
| Brown 2014     | Spotlight On Science. Improving Access Through Collaboration.                                                                                                                                | No  | Complex adaptive systems                          |                                        |
| Brown 2018     | Methodology Of a Cross-Sectional Study Evaluating the Impact of a Novel Mobile Care Team on The Prevalence of Ambulatory Care Sensitive Conditions Presenting to Emergency Medical Services. | Yes | Evidence informed practice and systems            |                                        |
| Brown 2018     | The Aging Population in Canada: A Shift in Paramedic Services Delivery.                                                                                                                      | No  | Social responsiveness, justice, equity and access | Evidence informed practice and systems |
| Brydges 2014   | A Case Study of Older Adult Experiences with A Novel Community Paramedicine Program                                                                                                          | Yes | Clinical reasoning                                |                                        |
| Brydges 2016   | The Chap-EMS Health Promotion Program: A Qualitative Study on Participants' Views of The Role of Paramedics                                                                                  | Yes | Clinical reasoning                                |                                        |

Emerging concepts in the paramedicine literature to inform the revision of a pan-Canadian competency framework for paramedics: a restricted review

|                            |                                                                                                                                                                                                        |     |                                                   |                                                   |
|----------------------------|--------------------------------------------------------------------------------------------------------------------------------------------------------------------------------------------------------|-----|---------------------------------------------------|---------------------------------------------------|
| Buick 2015                 | Does Location Matter? A Proposed Methodology to Evaluate Neighborhood Effects on Cardiac Arrest Survival and Bystander CPR                                                                             | Yes | Evidence informed practice and systems            |                                                   |
| Bussieres 2017             | Unite De Coordination Clinique des Services Prehospitaliers D'Urgence: A Clinical Telemedicine Platform That Improves Prehospital and Community Health Care for Rural Citizens.                        | Yes | Virtual Care                                      |                                                   |
| Bussieres 2018             | Clinical Adverse Events in Prehospital Patients with St-Elevation Myocardial Infarction Transported to A Percutaneous Coronary Intervention Centre by Basic Life Support Paramedics in A Rural Region. | Yes | Clinical reasoning                                | Evidence informed practice and systems            |
| Calderone 2017             | Community Paramedicine Initiative: Transforming Paramedicine in British Columbia.                                                                                                                      | Yes | Social responsiveness, justice, equity and access |                                                   |
| Cameron 2016               | The Canadian Paramedic Competency Profile for The Provision of Palliative and End-Of-Life Care: Time for A Change?                                                                                     | No  | Social responsiveness, justice, equity and access | Complex adaptive systems                          |
| Cameron, Lunn 2021         | Dealing With Dying: Progressing Paramedics Role in Grief Support                                                                                                                                       | Yes | Healthy Professionals                             | Social responsiveness, justice, equity and access |
| Campbell 2012              | Patient Management in The Emergency Department by Advanced Care Paramedics                                                                                                                             | Yes | Adaptive expertise                                | Complex adaptive systems                          |
| Campeau 2011               | The Paramedic Kairotope Theory: Findings.                                                                                                                                                              | Yes | Adaptive expertise                                |                                                   |
| Campeau 2016               | Paramedical Ethics During Acute Emergency Medical Service Referral                                                                                                                                     | Yes | Healthy Professionals                             |                                                   |
| Campeau 2016               | Paramedical Risk Framing During Field Referral of Acute Stroke And ST Elevation Myocardial Infarction Patients.                                                                                        | Yes | Clinical reasoning                                | Adaptive expertise                                |
| Canadian Paramedicine 2014 | Paramedics And Physicians Collaborate for Excellent Patient Care.                                                                                                                                      | No  | Adaptive expertise                                |                                                   |
| Canadian Paramedicine 2014 | Stress-Related Mental Health Issues in Paramedics and Their Families.                                                                                                                                  | No  | Healthy Professionals                             |                                                   |

Emerging concepts in the paramedicine literature to inform the revision of a pan-Canadian competency framework for paramedics: a restricted review

|                            |                                                                                                                                  |     |                                                   |                                                   |
|----------------------------|----------------------------------------------------------------------------------------------------------------------------------|-----|---------------------------------------------------|---------------------------------------------------|
| Canadian Paramedicine 2015 | Conducting EMS and Paramedic Research in Rural and Remote Locations: Challenges and Opportunities.                               | Yes | Learning environment                              | Social responsiveness, justice, equity and access |
| Canadian Paramedicine 2015 | National Standard for Workplace Psychological Health.                                                                            | No  | Healthy Professionals                             |                                                   |
| Canadian Paramedicine 2015 | Update On Redevelopment of The National Occupational Competency Profile.                                                         | No  | Learning environment                              |                                                   |
| Canadian Paramedicine 2016 | Building A Better Ambulance.                                                                                                     | Yes | Evidence informed practice and systems            | Healthy Professionals                             |
| Canadian Paramedicine 2016 | Successful Paramedic Position Within Defence Research and Development Canada - Centre for Security Science.                      | Yes | Complex adaptive systems                          |                                                   |
| Canadian Paramedicine 2017 | Crestline Unveils Canada's First Hybrid Ambulance.                                                                               | Yes | Planetary Health                                  |                                                   |
| Canadian Paramedicine 2017 | DRDC CSS Paramedic Investments/Projects.                                                                                         | No  | Complex adaptive systems                          |                                                   |
| Canadian Paramedicine 2017 | Next Generation Ambulances and Equipment: A National Standard.                                                                   | No  | Evidence informed practice and systems            | Planetary health                                  |
| Canadian Paramedicine 2018 | Bringing Community Paramedicine to BC's First Nations.                                                                           | No  | Social responsiveness, justice, equity and access |                                                   |
| Canadian Paramedicine 2018 | New Technology: Welcome Relief or Added Stress?                                                                                  | No  | Evidence informed practice and systems            |                                                   |
| Canadian Paramedicine 2018 | Paramedic Chiefs of Canada State Violence to Paramedics Is Unacceptable -- Release Position Statement on Violence to Paramedics. | No  | Healthy Professionals                             |                                                   |

Emerging concepts in the paramedicine literature to inform the revision of a pan-Canadian competency framework for paramedics: a restricted review

|                            |                                                                                                                                                    |     |                                                   |                                                   |
|----------------------------|----------------------------------------------------------------------------------------------------------------------------------------------------|-----|---------------------------------------------------|---------------------------------------------------|
| Canadian Paramedicine 2018 | Paramedicine For Rural and Remote British Columbians Gets an Upgrade.                                                                              | Yes | Social responsiveness, justice, equity and access |                                                   |
| Canadian Paramedicine 2021 | Paramedics Play an Important Role in International Air Ambulance Missions.                                                                         | No  | Adaptive expertise                                |                                                   |
| Carleton 2017              | Chronic Pain Among Public Safety Personnel in Canada                                                                                               | Yes | Healthy Professionals                             |                                                   |
| Carleton 2018              | Anxiety-Related Psychopathology and Chronic Pain Comorbidity Among Public Safety Personnel.                                                        | Yes | Healthy Professionals                             |                                                   |
| Carleton 2018              | Suicidal Ideation, Plans, And Attempts Among Public Safety Personnel in Canada.                                                                    | Yes | Healthy Professionals                             |                                                   |
| Carleton 2019              | Exposures To Potentially Traumatic Events Among Public Safety Personnel in Canada.                                                                 | Yes | Healthy Professionals                             |                                                   |
| Carrigan 2016              | The Prevalence and Characteristics of Non-Transported Patients in Nova Scotia                                                                      | Yes | Evidence informed practice and systems            |                                                   |
| Carter 2019                | Paramedics Providing Palliative Care at Home: A Mixed-Methods Exploration of Patient and Family Satisfaction and Paramedic Comfort and Confidence. | Yes | Clinical reasoning                                | Adaptive expertise                                |
| Carter 2021                | A National Collaborative to Spread and Scale Paramedics Providing Palliative Care in Canada: Breaking Down Silos Is Essential to Success           | Yes | Clinical reasoning                                | Adaptive expertise                                |
| Cavanagh 2020              | A rapid review of pandemic studies in paramedicine                                                                                                 | Yes | Complex adaptive systems                          |                                                   |
| Chan 2017                  | Community Paramedicine: Key Descriptions of Programs and Training                                                                                  | No  | Evidence informed practice and systems            |                                                   |
| Chan 2019                  | Community Paramedicine: A Systematic Review of Program Descriptions and Training.                                                                  | Yes | Evidence informed practice and systems            |                                                   |
| Cheskes 2020               | Improving Access to Automated External Defibrillators in Rural and Remote Settings: A Drone Delivery Feasibility Study.                            | Yes | Evidence informed practice and systems            | Social responsiveness, justice, equity and access |
| Chouinard 2020             | Paramedics And the Chance of a Better Outcome: Psychological Health and Safety and Employer Liability                                              | No  | Healthy Professionals                             |                                                   |
| Chu 2021                   | Machine Learning-Based Dispatch of Drone-Delivered Defibrillators for Out-Of-Hospital Cardiac Arrest.                                              | Yes | Evidence informed practice and systems            |                                                   |

Emerging concepts in the paramedicine literature to inform the revision of a pan-Canadian competency framework for paramedics: a restricted review

|                  |                                                                                                                                                                |     |                                                   |                                                   |
|------------------|----------------------------------------------------------------------------------------------------------------------------------------------------------------|-----|---------------------------------------------------|---------------------------------------------------|
| Clark 2017       | Emergency Response in A Rapidly Changing Arctic.                                                                                                               | Yes | Planetary Health                                  | Social responsiveness, justice, equity and access |
| Clark 2018       | What Role Can Unmanned Aerial Vehicles Play in Emergency Response in The Arctic: A Case Study from Canada.                                                     | Yes | Evidence informed practice and systems            | Planetary health                                  |
| Cochrane 2019    | Investigating The Attitudes of Canadian Paramedic Students Towards Homelessness.                                                                               | Yes | Social responsiveness, justice, equity and access |                                                   |
| Coffey 2016      | A Physical Demands Description of Paramedic Work in Canada                                                                                                     | Yes | Healthy Professionals                             |                                                   |
| Colbeck 2018     | International Examination and Synthesis of the Primary and Secondary Surveys in Paramedicine                                                                   | Yes | Clinical reasoning                                |                                                   |
| Crosetta 2019    | Patient Safety and Quality Improvement Education for Paramedics: Practicing What We Preach                                                                     | No  | Complex adaptive systems                          | Learning environment                              |
| Curley 2021      | First Responders' Perceptions of The Presence of Support Canines in The Workplace                                                                              | Yes | Healthy Professionals                             |                                                   |
| Curran 2018      | Conceptualizing And Managing Medical Emergencies Where No Formal Paramedical System Exists: Perspectives from A Remote Indigenous Community in Canada.         | Yes | Social responsiveness, justice, equity and access |                                                   |
| Cuthbertson 2021 | My Life as A Disabled Paramedic.                                                                                                                               | No  | Inclusion, diversity, equity and accessibility    |                                                   |
| Dainton 2021     | A Multicenter Study of Short-Term Changes in Mental Health Emergency Services Use During Lockdown in Kitchener-Waterloo, Ontario During the Covid-19 Pandemic. | Yes | Evidence informed practice and systems            |                                                   |
| Dainty 2013      | Developing A Canadian Emergency Medical Services Research Agenda: A Baseline Study of Stakeholder Opinions.                                                    | Yes | Complex adaptive systems                          |                                                   |
| Dainty 2018      | Home Visit-Based Community Paramedicine and Its Potential Role in Improving Patient-Centered Primary Care: A Grounded Theory Study and Framework.              | Yes | Clinical reasoning                                |                                                   |
| D'Angelo 2016    | Creating An Engaged Workforce.                                                                                                                                 | No  | Inclusion, diversity, equity and accessibility    |                                                   |



Emerging concepts in the paramedicine literature to inform the revision of a pan-Canadian competency framework for paramedics: a restricted review

|                      |                                                                                                                                               |     |                                                   |                                        |
|----------------------|-----------------------------------------------------------------------------------------------------------------------------------------------|-----|---------------------------------------------------|----------------------------------------|
| Dejean 2016          | Inappropriate Ambulance Use: A Qualitative Study of Paramedics' Views                                                                         | Yes | Clinical reasoning                                | Adaptive expertise                     |
| Do 2018              | At-A-Glance - What Can Paramedic Data Tell Us About the Opioid Crisis in Canada?                                                              | Yes | Evidence informed practice and systems            |                                        |
| Dohan 2017           | Technology Knowledge, Skills and Resources in Paramedicine: How Do They Help Paramedic Services Innovate?                                     | No  | Evidence informed practice and systems            |                                        |
| Dohan 2017           | The Impact of Healthcare Informatics Competencies on Dynamic Capabilities: A Multilevel Study of Paramedic Services                           | Yes | Evidence informed practice and systems            |                                        |
| Dol 2019             | Incidence Of Mortality Due to Rebound Toxicity After A 'Treat and Release' Practices in Prehospital Opioid Overdose Care: A Systematic Review | Yes | Social responsiveness, justice, equity and access | Evidence informed practice and systems |
| Donelon 2016         | Developing Our Profession Through Self-Regulation.                                                                                            | No  | Adaptive expertise                                |                                        |
| Donnelly 2016        | Predictors Of Posttraumatic Stress and Preferred Sources of Social Support Among Canadian Paramedics.                                         | Yes | Healthy Professionals                             |                                        |
| Donnelly 2019        | Fatigue And Safety in Paramedicine.                                                                                                           | Yes | Healthy Professionals                             |                                        |
| Donnelly 2020        | What Influences Safety in Paramedicine? Understanding The Impact of Stress and Fatigue on Safety Outcomes                                     | Yes | Healthy Professionals                             |                                        |
| Douglas 2012         | Paramedics' Experiences with Death Notification: A Qualitative Study.                                                                         | Yes | Healthy Professionals                             | Learning environment                   |
| Drennan 2014         | Expanding Paramedicine in The Community (Epic): Study Protocol for A Randomized Controlled Trial                                              | Yes | Complex adaptive systems                          |                                        |
| Drewitz-Chesney 2019 | Exploring Paramedic Communication and Emotional Expression in The Workplace After Responding to Emergency Calls                               | Yes | Healthy Professionals                             |                                        |
| Eaton and Mason 2019 | Values: What are they Worth in Paramedicine?                                                                                                  | No  | Clinical reasoning                                |                                        |
| Eaton 2020           | Change The Narrative                                                                                                                          | No  | Inclusion, diversity, equity and accessibility    |                                        |
| Farnady 2018         | Ethics And the Paramedic Profession.                                                                                                          | No  | Clinical reasoning                                |                                        |
| Ferrier 2017         | Evolution Of Canadian Paramedicine Slow? No Way!                                                                                              | No  | Complex adaptive systems                          |                                        |

Emerging concepts in the paramedicine literature to inform the revision of a pan-Canadian competency framework for paramedics: a restricted review

|                 |                                                                                                                                                                                 |     |                                                   |                                                   |
|-----------------|---------------------------------------------------------------------------------------------------------------------------------------------------------------------------------|-----|---------------------------------------------------|---------------------------------------------------|
| Ferron 2021     | The Effect of Covid-19 On Emergency Medical Service Call Volumes and Patient Acuity: A Cross-Sectional Study in Niagara, Ontario.                                               | Yes | Evidence informed practice and systems            |                                                   |
| Fischer 2017    | Identifying The Critical Physical Demanding Tasks of Paramedic Work: Towards the Development of a Physical Employment Standard.                                                 | Yes | Healthy Professionals                             |                                                   |
| Foerster 2017   | Ambiguities And Violations of Patient Autonomy from Ontario's Prehospital "Do Not Resuscitate" Form.                                                                            | No  | Social responsiveness, justice, equity and access | Clinical reasoning                                |
| Ford-Jones 2017 | A Critical Analysis of Debates Around Mental Health Calls in The Prehospital Setting                                                                                            | Yes | Social responsiveness, justice, equity and access |                                                   |
| Ford-Jones 2020 | Filling The Gap: Mental Health and Psychosocial Paramedicine Programming in Ontario, Canada                                                                                     | Yes | Social responsiveness, justice, equity and access | Complex adaptive systems                          |
| Ford-Jones 2020 | Mental Health and Psychosocial Calls in The Prehospital Setting in Ontario: A Qualitative Case Study                                                                            | Yes | Social responsiveness, justice, equity and access | Learning environment                              |
| Ford-Jones 2020 | Paramedicine And Mental Health: A Qualitative Analysis of Limitations to Education and Practice in Ontario.                                                                     | Yes | Learning environment                              | Social responsiveness, justice, equity and access |
| Fuzery 2020     | Point-Of-Care Testing Practices, Failure Modes, And Risk-Mitigation Strategies in Emergency Medical Services Programs in The Canadian Province of Alberta.                      | Yes | Evidence informed practice and systems            |                                                   |
| Glicksman 2021  | Prepatching Reduces Paramedic In-Hospital Time for Emergent Interfacility Transfers of Patients Requiring Mechanical Ventilation or Vasopressors: A Retrospective Cohort Study. | Yes | Evidence informed practice and systems            |                                                   |
| Goldstein 2015  | The Epidemiology of Prehospital Emergency Responses for Older Adults in A Provincial Ems System.                                                                                | Yes | Complex adaptive systems                          | Evidence informed practice and systems            |

Emerging concepts in the paramedicine literature to inform the revision of a pan-Canadian competency framework for paramedics: a restricted review

|                      |                                                                                                                                                                                 |     |                                                   |                                                   |
|----------------------|---------------------------------------------------------------------------------------------------------------------------------------------------------------------------------|-----|---------------------------------------------------|---------------------------------------------------|
| Goldstein 2015       | The Role of Emergency Medical Services in Geriatrics: Bridging the Gap Between Primary and Acute Care.                                                                          | Yes | Social responsiveness, justice, equity and access | Evidence informed practice and systems            |
| Gomez-Gutierrez 2014 | Posttraumatic Stress Symptomatology in Pre-Hospital Emergency Care Professionals Assaulted by Patients And/or Relatives Importance of Severity and Experience of The Aggression | Yes | Healthy Professionals                             |                                                   |
| Graham 2016          | The Upstream Paramedic.                                                                                                                                                         | No  | Complex adaptive systems                          | Social responsiveness, justice, equity and access |
| Graham 2018          | Community Paramedic: A Practitioner's Perspective.                                                                                                                              | No  | Healthy Professionals                             |                                                   |
| Greene 2021          | A Service Evaluation of Prehospital Blood Transfusion by Critical Care Paramedics in British Columbia, Canada.                                                                  | Yes | Evidence informed practice and systems            | Clinical reasoning                                |
| Grenier 2021         | Enhancing Professional Practice and Professionalism Among Canadian Rural Paramedics                                                                                             | Yes | Adaptive expertise                                |                                                   |
| Hansen 2017          | Prehospital Management of Acute Stroke in Rural Versus Urban Responders                                                                                                         | Yes | Social responsiveness, justice, equity and access |                                                   |
| Hebert 2021          | Remote Certification of Out-Of-Hospital Deaths in A Canadian Province: An 8-Year Experience of a Novel Practice                                                                 | Yes | Evidence informed practice and systems            | Complex adaptive systems                          |
| Heidet 2021          | Rationale, Development and Implementation of The Reacanroc Registry for Out-Of-Hospital Cardiac Arrests in France and Canada.                                                   | Yes | Evidence informed practice and systems            |                                                   |
| Heinelt 2015         | Prehospital Identification of Underlying Coronary Artery Disease by Community Paramedics.                                                                                       | Yes | Social responsiveness, justice, equity and access | Complex adaptive systems                          |
| Helmer 2021          | The Women of The North.                                                                                                                                                         | No  | Inclusion, diversity, equity and accessibility    |                                                   |
| Hilliard 2017        | An Introduction to Reflective Practice for Paramedics and Student Paramedics.                                                                                                   | No  | Adaptive expertise                                |                                                   |
| Hines Duncliffe 2019 | When Ambulances Crash.                                                                                                                                                          | No  | Healthy Professionals                             |                                                   |

Emerging concepts in the paramedicine literature to inform the revision of a pan-Canadian competency framework for paramedics: a restricted review

|               |                                                                                                                                                                              |     |                                        |                                        |
|---------------|------------------------------------------------------------------------------------------------------------------------------------------------------------------------------|-----|----------------------------------------|----------------------------------------|
| Homier 2020   | Drone Versus Ground Delivery of Simulated Blood Products to An Urban Trauma Center: The Montreal Medi-Drone Pilot Study.                                                     | Yes | Evidence informed practice and systems |                                        |
| Jain 2018     | Comparison Of Unmanned Aerial Vehicle Technology-Assisted Triage Versus Standard Practice in Triaging Casualties by Paramedic Students in A Mass-Casualty Incident Scenario. | Yes | Evidence informed practice and systems |                                        |
| Jain 2021     | Comparison Of Unmanned Aerial Vehicle Technology Versus Standard Practice of Scene Assessment by Paramedic Students of a Mass-Gathering Event.                               | Yes | Evidence informed practice and systems |                                        |
| James 2018    | Organ Donation - A Role for Paramedics?                                                                                                                                      | No  | Clinical reasoning                     | Complex adaptive systems               |
| Javidan 2020  | Clinical Handover from Emergency Medical Services to The Trauma Team: A Gap Analysis.                                                                                        | Yes | Clinical reasoning                     |                                        |
| Jensen 2011   | Consensus On Paramedic Clinical Decisions During High-Acuity Emergency Calls: Results of A Canadian Delphi Study.                                                            | Yes | Clinical reasoning                     |                                        |
| Jensen 2011   | Methodology For the Development of a Canadian National EMS Research Agenda.                                                                                                  | Yes | Learning environment                   |                                        |
| Jensen 2011   | Towards National Evidence-Informed Practice Guidelines for Canadian EMS: Future Directions.                                                                                  | Yes | Clinical reasoning                     | Evidence informed practice and systems |
| Jensen 2014   | The Canadian National EMS Research Agenda.                                                                                                                                   | No  | Learning environment                   |                                        |
| Jensen 2015   | Alternatives To Traditional EMS Dispatch and Transport: A Scoping Review of Reported Outcomes.                                                                               | Yes | Evidence informed practice and systems |                                        |
| Jensen 2015   | The Canadian National EMS Research Agenda: Impact and Feasibility of Implementation of Previously Generated Recommendations.                                                 | Yes | Learning environment                   |                                        |
| Jensen 2017   | Contemporary Evidence-Based Practice in Canadian Emergency Medical Services: A Vision for Integrating Evidence into Clinical and Policy Decision-Making.                     | Yes | Clinical reasoning                     |                                        |
| Johnston 2018 | Keeping Them on Their Feet: Novel Solutions to the Emerging Lift Assist Trend                                                                                                | No  | Adaptive expertise                     | Evidence informed practice and systems |
| Johnston 2019 | Canadian Paramedic Program Use of Realistic Simulation in Education (Purse): A Descriptive Study.                                                                            | Yes | Learning environment                   |                                        |

Emerging concepts in the paramedicine literature to inform the revision of a pan-Canadian competency framework for paramedics: a restricted review

|                |                                                                                                                                                                                   |     |                                                   |                          |
|----------------|-----------------------------------------------------------------------------------------------------------------------------------------------------------------------------------|-----|---------------------------------------------------|--------------------------|
| Juhrmann 2021  | Paramedics Delivering Palliative and End-Of-Life Care in Community-Based Settings: A Systematic Integrative Review with Thematic Synthesis.                                       | Yes | Social responsiveness, justice, equity and access | Complex adaptive systems |
| Kapoor 2020    | Call 911: Lower Ambulance Utilization Among Young Adults, Especially Women, With Stroke.                                                                                          | Yes | Social responsiveness, justice, equity and access | Complex adaptive systems |
| Kearns 2018    | Analysis Of 9-1-1 Call Data from An Emergency Management Perspective: A Case Study of The City of Lethbridge                                                                      | Yes | Evidence informed practice and systems            |                          |
| Kent 2016      | Eat, Sleep and Be Healthy: a Paramedic's Guide to Healthier Shift Work.                                                                                                           | No  | Healthy Professionals                             |                          |
| Kohl 2021      | A "Paramedic-Athlete" Model for Improving Mental Wellness and Resilience in Canadian Paramedicine.                                                                                | No  | Healthy Professionals                             |                          |
| Koopmans 2017  | Emergency Response Services Suicide: A Crisis in Canada?                                                                                                                          | Yes | Healthy Professionals                             |                          |
| Kornelsen 2018 | High Acuity Rural Transport: Findings from A Qualitative Investigation.                                                                                                           | Yes | Social responsiveness, justice, equity and access |                          |
| Kornelsen 2021 | Rural Citizen-Patient Priorities for Healthcare in British Columbia, Canada: Findings from A Mixed Methods Study.                                                                 | Yes | Social responsiveness, justice, equity and access |                          |
| Krook 2019     | Blood On Board: The Development of a Prehospital Blood Transfusion Program in A Canadian Helicopter Emergency Medical Service.                                                    | Yes | Evidence informed practice and systems            | Complex adaptive systems |
| Kuluski 2016   | Patterns Of Community Follow-Up, Subsequent Health Service Use and Survival Among Young and Mid-Life Adults Discharged from Chronic Care Hospitals: A Retrospective Cohort Study. | Yes | Evidence informed practice and systems            |                          |
| Kus 2018       | Exploring Empathy Levels among Canadian Paramedic Students                                                                                                                        | Yes | Healthy Professionals                             |                          |
| Lad 2018       | Comparing The Biomechanical and Psychophysical Demands Imposed on Paramedics When Using Manual and Powered Stretchers.                                                            | Yes | Healthy Professionals                             |                          |
| Laidlaw 2015   | First Responder Suicides: Is There a Solution?                                                                                                                                    | No  | Healthy Professionals                             |                          |

Emerging concepts in the paramedicine literature to inform the revision of a pan-Canadian competency framework for paramedics: a restricted review

|                |                                                                                                                                                  |     |                                                   |                          |
|----------------|--------------------------------------------------------------------------------------------------------------------------------------------------|-----|---------------------------------------------------|--------------------------|
| Langridge 2021 | Microaggression in Paramedic Practice                                                                                                            | No  | Inclusion, diversity, equity and accessibility    |                          |
| Lanos 2019     | Navigating Pre-Hospital End of Life Care: A Paramedic Perspective                                                                                | No  | Complex adaptive systems                          | Clinical reasoning       |
| Lanos 2019     | GoSponsor Us. Going beyond Mentoring for Women in Paramedicine                                                                                   | No  | Inclusion, diversity, equity and accessibility    |                          |
| Leblanc 2012   | The Impact of Stress on Paramedic Performance During Simulated Critical Events.                                                                  | Yes | Healthy Professionals                             | Clinical reasoning       |
| Leduc 2021     | Community Paramedicine for Long-Term Care Patients: Examining Clinical Conditions Manageable by Paramedics, Avoiding Emergency Department Visits | Yes | Social responsiveness, justice, equity and access | Complex adaptive systems |
| Leeies 2017    | Prehospital Application of The Canadian Triage and Acuity Scale by Emergency Medical Services.                                                   | Yes | Evidence informed practice and systems            |                          |
| Leggatt 2017   | Morbidity And Mortality Associated with Prehospital "Lift-Assist" Calls.                                                                         | Yes | Evidence informed practice and systems            |                          |
| Leggio 2014    | Objectives, Taxonomies and Competencies of Community Oriented and Community Based Education Applied to Community Paramedicine                    | Yes | Adaptive expertise                                | Clinical reasoning       |
| Lentz 2021     | Compromised Conscience: A Scoping Review of Moral Injury Among Firefighters, Paramedics, And Police Officers.                                    | Yes | Healthy Professionals                             |                          |
| Leung 2021     | Public Defibrillator Accessibility and Mobility Trends During the Covid-19 Pandemic in Canada.                                                   | Yes | Evidence informed practice and systems            |                          |
| Levesque 2014  | Paramedic Woman's Community.                                                                                                                     | No  | Inclusion, diversity, equity and accessibility    |                          |
| Levitan 2018   | Paramedics' Perspectives on Factors Impacting On-Scene Times for Trauma Calls.                                                                   | Yes | Clinical reasoning                                |                          |
| Leyenaar 2019  | Examining Consensus for A Standardized Patient Assessment in Community Paramedicine Home Visits: A Rand/UCLA-Modified Delphi Study.              | Yes | Clinical reasoning                                |                          |
| Leyenaar 2019  | Indicators Of Paramedic Service Use by Community Dwelling Older Adults                                                                           | Yes | Social responsiveness, justice, equity and access |                          |
| Leyenaar 2019  | What Do Community Paramedics Assess? An Environmental Scan and Content Analysis of Patient Assessment in Community Paramedicine.                 | Yes | Clinical reasoning                                |                          |

Emerging concepts in the paramedicine literature to inform the revision of a pan-Canadian competency framework for paramedics: a restricted review

|                 |                                                                                                                                                                                       |     |                                                   |                                        |
|-----------------|---------------------------------------------------------------------------------------------------------------------------------------------------------------------------------------|-----|---------------------------------------------------|----------------------------------------|
| Leyenaar 2020   | Community Paramedicine: Part of A Modern Emergency Health Services System.                                                                                                            | No  | Complex adaptive systems                          |                                        |
| Leyenaar 2021   | Paramedics Assessing Patients with Complex Comorbidities in Community Settings: Results from The Carpe Study.                                                                         | Yes | Clinical reasoning                                | Complex adaptive systems               |
| Leyenaar 2021   | Relevance Of Assessment Items in Community Paramedicine Home Visit Programmes: Results of A Modified Delphi Study.                                                                    | Yes | Clinical reasoning                                |                                        |
| Liu 2020        | Patient And Paramedic Experiences with A Direct Electronic Referral Program for Hypoglycemia Education Following Paramedic Service Assist-Requiring Hypoglycemia: A Qualitative Study | Yes | Evidence informed practice and systems            | Clinical reasoning                     |
| Lobay 2017      | Transport Determinants for Continuing Care Residents Assessed by An Ems Urgent Response Team: A Retrospective Observational Study.                                                    | Yes | Evidence informed practice and systems            |                                        |
| Long 2019       | Paramedic Delivery of Community-Based Palliative Care: An Overlooked Resource?                                                                                                        | Yes | Complex adaptive systems                          |                                        |
| Lunn 2021       | Call To Action: Antiracism in Paramedicine.                                                                                                                                           | No  | Anti-racism                                       |                                        |
| Lunsky 2015     | Predictors Of Emergency Service Use in Adolescents and Adults with Autism Spectrum Disorder Living with Family                                                                        | Yes | Social responsiveness, justice, equity and access | Complex adaptive systems               |
| Macdonald 2021  | Pre-transport Risk Assessment of Agitated Patients in Air Medical Transport.                                                                                                          | Yes | Evidence informed practice and systems            |                                        |
| Mackey 2017     | Paramedic Identification and Management of Victims of Intimate Partner Violence: A Literature Review                                                                                  | Yes | Social responsiveness, justice, equity and access |                                        |
| Macquarrie 2014 | Fit For Duty: The Demands of Paramedic Performance.                                                                                                                                   | No  | Healthy Professionals                             |                                        |
| Macquarrie 2016 | Measuring And Predicting Paramedic Physiological Performance.                                                                                                                         | No  | Healthy Professionals                             |                                        |
| Mahmuda 2018    | Understanding Why Frequent Users of Ems Call 9-1-1: A Grounded Theory Study:                                                                                                          | Yes | Social responsiveness, justice, equity and access | Evidence informed practice and systems |
| Makrides 2021   | Advanced Care or Advanced Life Support What Are We Providing?                                                                                                                         | Yes | Learning environment                              |                                        |

Emerging concepts in the paramedicine literature to inform the revision of a pan-Canadian competency framework for paramedics: a restricted review

|              |                                                                                                                                  |     |                                                   |
|--------------|----------------------------------------------------------------------------------------------------------------------------------|-----|---------------------------------------------------|
| Martin 2016  | Consumer Perspectives of a Community Paramedicine Program in Rural Ontario.                                                      | Yes | Clinical reasoning                                |
| Martin 2017  | Mobile Emergency Simulation Training for Rural Health Providers.                                                                 | Yes | Learning environment                              |
| Martin 2019  | Perspectives From the Frontline of Two North American Community Paramedicine Programs: An Observational, Ethnographic Study.     | Yes | Learning environment                              |
| Mason 2018   | Let's Make This Our "Thing": Leveling the Playing Field for A Brighter Future in Paramedicine.                                   | No  | Inclusion, diversity, equity and accessibility    |
| Mason 2020   | Diversity Champion Program -- An Initiative of The Ottawa Paramedic Service.                                                     | No  | Inclusion, diversity, equity and accessibility    |
| Mausz 2015   | The Impact of Prehospital Resuscitation Research on In-Hospital Care.                                                            | Yes | Evidence informed practice and systems            |
| Mausz 2016   | Learning In Professionally 'Distant' Contexts: Opportunities and Challenges.                                                     | Yes | Learning environment                              |
| Mausz 2021   | The Relationship Between Role Identity and Mental Health Among Paramedics                                                        | Yes | Healthy Professionals                             |
| Mausz 2021   | The Role of Organizational Culture in Normalizing Paramedic Exposure to Violence                                                 | Yes | Healthy Professionals                             |
| Maynard 2021 | Lowering The Ladder.                                                                                                             | No  | Inclusion, diversity, equity and accessibility    |
| McCall 2021  | Stakeholder Perspectives on Internet-Delivered Cognitive Behavioral Therapy for Public Safety Personnel: A Qualitative Analysis. | Yes | Healthy Professionals                             |
| McCann 2018  | Foam For Canadian Paramedics.                                                                                                    | No  | Learning environment                              |
| Mellow 2017  | Evidence-Based Ems. Overcoming Stress: Groundbreaking Data Collected on Mental Health of First Responders.                       | Yes | Healthy Professionals                             |
| Mercer 2018  | Leading On the Edge: The Nature of Paramedic Leadership at The Front Line of Care.                                               | Yes | Adaptive expertise                                |
| Mew 2017     | An Environmental Scan of Emergency Response Systems and Services in Remote First Nations Communities in Northern Ontario.        | Yes | Social responsiveness, justice, equity and access |
| Moallef 2021 | A Drug-Related Good Samaritan Law and Calling Emergency Medical Services for Drug Overdoses in A Canadian Setting.               | Yes | Social responsiveness, justice, equity and access |



Emerging concepts in the paramedicine literature to inform the revision of a pan-Canadian competency framework for paramedics: a restricted review

|                    |                                                                                                                                                      |     |                                                   |                                        |
|--------------------|------------------------------------------------------------------------------------------------------------------------------------------------------|-----|---------------------------------------------------|----------------------------------------|
| Morales 2016       | Patient Acuity as A Determinant of Paramedics' Frequency of Being Exposed to Physically Demanding Work Activities.                                   | Yes | Healthy Professionals                             | Evidence informed practice and systems |
| Nemiroff 2019      | Adherence To "No Transfer to Hospital" Advance Directives Among Nursing Home Residents.                                                              | Yes | Evidence informed practice and systems            | clinical reasoning                     |
| Nolan 2015         | The Disparity Between Urban, Rural and Remote Paramedic Service in Canada.                                                                           | No  | Social responsiveness, justice, equity and access |                                        |
| Nolan 2018         | Community Paramedicine Is Growing in Impact and Potential.                                                                                           | Yes | Social responsiveness, justice, equity and access |                                        |
| Nolan 2020         | Recommendations For Emergency Departments Receiving Patients with Vital Signs Absent from Paramedics During Covid-19.                                | Yes | Evidence informed practice and systems            |                                        |
| Nolan 2020         | Risk Factors for Non-Optimal Resource Utilization for Emergent Interfacility Transfers by Air Ambulance in Ontario.                                  | Yes | Evidence informed practice and systems            |                                        |
| Nowrouzi-Kia 2021  | Quality Of Work Life of Paramedics Practicing Community Paramedicine in Northern Ontario, Canada: A Mixed-Methods Sequential Explanatory Study.      | Yes | Healthy Professionals                             |                                        |
| O'Dochartaigh 2017 | Five-Year Retrospective Review of Physician and Non-Physician Performed Ultrasound in A Canadian Critical Care Helicopter Emergency Medical Service. | Yes | Evidence informed practice and systems            | clinical reasoning                     |
| Ogunade 2021       | Public Perceptions of The Cost of Paramedic Services in Saskatchewan, Canada                                                                         | Yes | Clinical reasoning                                |                                        |
| Olsen 2020         | Large-Scale Air Medical Operations in The Age of Coronavirus Disease 2019: Early Leadership Lessons from The Front Lines of British Columbia         | Yes | Evidence informed practice and systems            |                                        |
| O'Meara 2014       | Community Paramedicine: Higher Education as An Enabling Factor                                                                                       | Yes | Learning environment                              |                                        |
| O'Meara 2014       | Paramedic Self-Regulation and Professional Autonomy.                                                                                                 | No  | Adaptive expertise                                |                                        |
| O'Meara 2015       | Integrating A Community Paramedicine Program with Local Health, Aged Care and Social Services: An Observational Ethnographic Study                   | Yes | Social responsiveness, justice, equity and access | Complex adaptive systems               |
| O'Meara 2016       | Community Paramedicine Model of Care: An Observational, Ethnographic Case Study                                                                      | Yes | Social responsiveness,                            | Complex adaptive systems               |

Emerging concepts in the paramedicine literature to inform the revision of a pan-Canadian competency framework for paramedics: a restricted review

|                   |                                                                                                                                                                                             |     |                                                   |                                                   |
|-------------------|---------------------------------------------------------------------------------------------------------------------------------------------------------------------------------------------|-----|---------------------------------------------------|---------------------------------------------------|
|                   |                                                                                                                                                                                             |     | justice, equity and access                        |                                                   |
| Orkin 2012        | Where There Is No Paramedic: The Sachigo Lake Wilderness Emergency Response Education Initiative.                                                                                           | Yes | Social responsiveness, justice, equity and access |                                                   |
| Orkin 2016        | Community-Based Emergency Care: A Model for Prehospital Care in Remote Canadian Communities.                                                                                                | Yes | Social responsiveness, justice, equity and access |                                                   |
| Pagano 2018       | Empathy Levels in Canadian Paramedic Students: A Longitudinal Study.                                                                                                                        | Yes | Healthy Professionals                             |                                                   |
| Prevost 2019      | Patient Experiences in Rural Northern Ontario: Small Hospital Utilization and Perspectives on Community Paramedicine                                                                        | No  | Clinical reasoning                                | Social responsiveness, justice, equity and access |
| Ramey 2019        | Drowsy And Dangerous? Fatigue In Paramedics: An Overview                                                                                                                                    | Yes | Healthy Professionals                             |                                                   |
| Reay 2018         | Creative Adapting in A Fluid Environment: An Explanatory Model of Paramedic Decision Making in The Pre-Hospital Setting.                                                                    | Yes | Adaptive expertise                                | clinical reasoning                                |
| Redpath 2018      | Big Advancements in Safely Delivering Tiny Packages: OMM Paramedic Service and The Children's Hospital of Eastern Ontario Partner in The Creation of a Specialized Neonatal Transport Unit. | No  | Complex adaptive systems                          |                                                   |
| Reece 2015        | UAVs: Drones and You!                                                                                                                                                                       | No  | Evidence informed practice and systems            |                                                   |
| Reece 2015        | Unmanned Air Vehicles.                                                                                                                                                                      | No  | Evidence informed practice and systems            |                                                   |
| Ricciardelli 2019 | Fit For Public Safety: Informing Attitudes and Practices Tied to The Hiring of Public Safety Personnel                                                                                      | Yes | Inclusion, diversity, equity and accessibility    | Healthy Professionals                             |
| Ricciardelli 2020 | Public Safety Personnel's Interpretations of Potentially Traumatic Events                                                                                                                   | Yes | Healthy Professionals                             |                                                   |
| Robar 2014        | Paramedics And the Mental Health Patient.                                                                                                                                                   | No  | Social responsiveness, justice, equity and access |                                                   |
| Robb 2019         | Patient Safety and Quality Improvement Education for Paramedics: The Role of the IHI Open School Chapter                                                                                    | No  | Learning environment                              | Complex adaptive systems                          |
| Roberts 2015      | Pandemic Preparedness of B.C. Paramedics.                                                                                                                                                   | Yes | Adaptive expertise                                | Complex adaptive systems                          |
| Rosa 2021         | Community Paramedicine to Support Palliative Care                                                                                                                                           | Yes | Complex adaptive systems                          |                                                   |

Emerging concepts in the paramedicine literature to inform the revision of a pan-Canadian competency framework for paramedics: a restricted review

|                  |                                                                                                                                                                                                                    |     |                                                   |                                                   |
|------------------|--------------------------------------------------------------------------------------------------------------------------------------------------------------------------------------------------------------------|-----|---------------------------------------------------|---------------------------------------------------|
| Rouse 2018       | A Traumatic Tale of Two Cities: Does Ems Level of Care and Transportation Model Affect Survival in Patients with Trauma at Level 1 Trauma Centers in Two Neighboring Canadian Provinces?                           | Yes | Evidence informed practice and systems            |                                                   |
| Ruest 2016       | County Of Renfrew Paramedic Service Paramedic Resilience Program Contribution to The Health Promotion Strategies That Address the Inequities Associated with Social Isolation of Seniors in The County of Renfrew. | No  | Social responsiveness, justice, equity and access |                                                   |
| Ruest 2017       | Canadian Safety and Security Program - Paramedic Community of Practice Update.                                                                                                                                     | No  | Evidence informed practice and systems            |                                                   |
| Ruest 2017       | Canadian Safety and Security Program: Paramedic Review Report 2012-2017.                                                                                                                                           | No  | Evidence informed practice and systems            |                                                   |
| Ruest 2017       | Community Health Evaluations Completed Using Paramedic Service (Checups): Design and Implementation of a New Community-Based Health Program.                                                                       | No  | Complex adaptive systems                          | Social responsiveness, justice, equity and access |
| Schierholtz 2019 | Impact Of Lift Assist Calls on Paramedic Services: A Descriptive Study.                                                                                                                                            | Yes | Evidence informed practice and systems            |                                                   |
| Schwartz 2015    | Transfer Of Care and Offload Delay: Continued Resistance or Integrative Thinking?                                                                                                                                  | Yes | Evidence informed practice and systems            | Complex adaptive systems                          |
| Sedlakova 2020   | Prehospital Ultrasound Use Among Canadian Aeromedical Service Providers - A Cross-Sectional Survey.                                                                                                                | Yes | Evidence informed practice and systems            |                                                   |
| Setlack 2021     | Workplace Violence and Psychopathology in Paramedics and Firefighters: Mediated by Posttraumatic Cognitions.                                                                                                       | Yes | Healthy Professionals                             |                                                   |
| Severson 2019    | Interoperability In Incident Command.                                                                                                                                                                              | Yes | Adaptive expertise                                |                                                   |
| Shang 2021       | Discrimination Experienced by Asian Canadian and Asian American Health Care Workers During the Covid-19 Pandemic: A Qualitative Study.                                                                             | Yes | Inclusion, diversity, equity and accessibility    |                                                   |
| Sheffield 2016   | Decision-Making Processes When Paramedics Refer Low Acuity Patients Away from Hospital: A Scoping Review.                                                                                                          | Yes | Clinical reasoning                                |                                                   |
| Sinclair 2018    | Barriers To Self-Reporting Patient Safety Incidents by Paramedics: A Mixed Methods Study.                                                                                                                          | Yes | Learning environment                              | Complex adaptive systems                          |

Emerging concepts in the paramedicine literature to inform the revision of a pan-Canadian competency framework for paramedics: a restricted review

|                      |                                                                                                                                                                                    |     |                                                |                    |
|----------------------|------------------------------------------------------------------------------------------------------------------------------------------------------------------------------------|-----|------------------------------------------------|--------------------|
| Smith 2015           | Analyzing The Usability of the 5-Level Canadian Triage and Acuity Scale by Paramedics in The Prehospital Environment.                                                              | Yes | Evidence informed practice and systems         |                    |
| Smith 2017           | What International Models Can Teach Us About High-Performance Ems.                                                                                                                 | No  | Evidence informed practice and systems         |                    |
| Smith-Macdonald 2021 | Meat In a Seat: A Grounded Theory Study Exploring Moral Injury in Canadian Public Safety Communicators, Firefighters, And Paramedics.                                              | Yes | Healthy Professionals                          |                    |
| Speers 2021          | Stronger Together: Recognizing our Biases, and Working Together to Become Agents of Change                                                                                         | No  | Inclusion, diversity, equity and accessibility |                    |
| Stelnicki 2021       | Evaluation Of Before Operational Stress: A Program to Support Mental Health and Proactive Psychological Protection in Public Safety Personnel.                                     | Yes | Healthy Professionals                          |                    |
| Stewart 2019         | Are Emergency Medical Services Offload Delay Patients at Increased Risk of Adverse Outcomes?                                                                                       | Yes | Evidence informed practice and systems         |                    |
| Strum 2021           | Examining The Association Between Paramedic Transport to The Emergency Department and Hospital Admission: A Population-Based Cohort Study.                                         | Yes | Evidence informed practice and systems         |                    |
| Strum 2021           | Identifying Patient Characteristics Associated with Potentially Redirectable Paramedic Transported Emergency Department Visits in Ontario, Canada: A Population-Based Cohort Study | Yes | Evidence informed practice and systems         |                    |
| Strum 2022           | Emergency Department Interventions That Could Be Conducted in Subacute Care Settings for Patients with Nonemergent Conditions Transported by Paramedics: A Modified Delphi Study.  | Yes | Evidence informed practice and systems         |                    |
| Szeto 2016           | Paramedicine And the R2Mr - Road to Mental Readiness.                                                                                                                              | No  | Healthy Professionals                          |                    |
| Szeto 2019           | The Road to Mental Readiness for First Responders: A Meta-Analysis of Program Outcomes.                                                                                            | Yes | Healthy Professionals                          |                    |
| Tavares 2013         | Global Rating Scale for The Assessment of Paramedic Clinical Competence                                                                                                            | Yes | Learning environment                           |                    |
| Tavares 2016         | Informing A Canadian Paramedic Profile: Framing Concepts, Roles and Crosscutting Themes.                                                                                           | Yes | Learning environment                           | Adaptive expertise |
| Tavares 2017         | Building Capacity in Healthcare by Re-Examining Clinical Services in Paramedicine.                                                                                                 | Yes | Complex adaptive systems                       |                    |

Emerging concepts in the paramedicine literature to inform the revision of a pan-Canadian competency framework for paramedics: a restricted review

|                   |                                                                                                                                                                                                    |     |                                                   |                                                   |
|-------------------|----------------------------------------------------------------------------------------------------------------------------------------------------------------------------------------------------|-----|---------------------------------------------------|---------------------------------------------------|
| Tavares 2021      | Principles to guide the future of paramedicine in Canada                                                                                                                                           | Yes | Learning environment                              | Complex adaptive systems                          |
| Terashima 2018    | Correlation Of Age and Rurality with Low-Urgency Use of Emergency Medical Services (Luems): A Geographic Analysis.                                                                                 | Yes | Evidence informed practice and systems            |                                                   |
| Thompson 2018     | Apercu - Que Peuvent Nous Reveler Les Donnees Des Ambulanciers Paramedicaux Sur La Crise Des Opioides Au Canada?, At-A-Glance - What Can Paramedic Data Tell Us About The Opioid Crisis In Canada? | Yes | Evidence informed practice and systems            |                                                   |
| Thurman 2020      | A Scoping Review of Community Paramedicine: Evidence and Implications for Interprofessional Practice.                                                                                              | Yes | Adaptive expertise                                |                                                   |
| Tien 2011         | The Canadian Forces Trauma Care System                                                                                                                                                             | Yes | Evidence informed practice and systems            |                                                   |
| Tien 2018         | How Air Ambulance Services Can Improve Care Delivered to Remote Indigenous Communities.                                                                                                            | Yes | Evidence informed practice and systems            | Social responsiveness, justice, equity and access |
| Tremblay 2020     | Exploration Of the Health Status of Experienced New Brunswick Paramedics.                                                                                                                          | No  | Healthy Professionals                             |                                                   |
| Tremblay 2020     | Physiological Responses During Paramedics' Simulated Driving Tasks.                                                                                                                                | Yes | Healthy Professionals                             |                                                   |
| Triska 2014       | Spotlight On Science. Studying Ourselves: Caring for Paramedics with Occupational Stress.                                                                                                          | No  | Healthy Professionals                             |                                                   |
| Trombley 2020     | It's Not Just All Grandmas and Cookies: A Day in The Life of a Rural Community Paramedic.                                                                                                          | No  | Social responsiveness, justice, equity and access |                                                   |
| Ulrich 2021       | Female Leaders in Paramedicine: Sharing the Hive or A Sting in Their Tale?                                                                                                                         | No  | Inclusion, diversity, equity and accessibility    |                                                   |
| Vacon 2016        | Is Your Equipment What It Claims to Be?                                                                                                                                                            | No  | Evidence informed practice and systems            |                                                   |
| Vaillancourt 2018 | Patient And Paramedic Engagement in Prehospital Emergency Medicine Research.                                                                                                                       | Yes | Learning environment                              |                                                   |
| Vanderburgh 2014  | Community-Based First Aid: A Program Report on The Intersection of Community-Based Participatory Research and First Aid Education in A Remote Canadian Aboriginal Community.                       | Yes | Learning environment                              | Social responsiveness, justice, equity and access |
| Vandermeulen 2021 | "That's Why People Don't Call 911": Ending Routine Police Attendance at Drug Overdoses.                                                                                                            | Yes | Social responsiveness,                            | Complex adaptive systems                          |

Emerging concepts in the paramedicine literature to inform the revision of a pan-Canadian competency framework for paramedics: a restricted review

|                    |                                                                                                                                                                  |     |                                        |                                                   |
|--------------------|------------------------------------------------------------------------------------------------------------------------------------------------------------------|-----|----------------------------------------|---------------------------------------------------|
|                    |                                                                                                                                                                  |     | justice, equity and access             |                                                   |
| Vaughan 2020       | Building Personal Resilience in Primary Care Paramedic Students, And Subsequent Skill Decay                                                                      | Yes | Healthy Professionals                  |                                                   |
| Verma 2018         | Paramedic-Initiated Home Care Referrals and Use of Home Care and Emergency Medical Services.                                                                     | Yes | Evidence informed practice and systems |                                                   |
| Vig 2020           | Mental Health and Social Support Among Public Safety Personnel                                                                                                   | Yes | Healthy Professionals                  |                                                   |
| Walker 2013        | The Impact of Intense Airway Management Training on Paramedic Knowledge and Confidence Measured Before, Immediately After and at 6 And 12 Months After Training. | Yes | Learning environment                   |                                                   |
| Walker 2014        | What Successful Community Paramedic Programs Do Well...                                                                                                          | No  | Complex adaptive systems               |                                                   |
| Waterman 2020      | Abdominal Ultrasound Image Acquisition and Interpretation by Novice Practitioners After Minimal Training on A Simulated Patient Model.                           | Yes | Evidence informed practice and systems |                                                   |
| West 2016          | Violence Against Paramedics: Student Paramedics Speak Out.                                                                                                       | No  | Healthy Professionals                  |                                                   |
| Whate 2021         | Performance Of the InterRAI Ed Screener for Risk-Screening in Older Adults Accessing Paramedic Services.                                                         | Yes | Evidence informed practice and systems |                                                   |
| Whitfield 2020     | The Polar Opposites ... Or not? Comparing Rural Ambulance in Canada and Australia.                                                                               | No  | Adaptive expertise                     | Social responsiveness, justice, equity and access |
| Williamson 2021    | A Qualitative Study to Identify Factors That Influence Patients' Decisions to Call Emergency Medical Services for Syncope.                                       | Yes | Evidence informed practice and systems |                                                   |
| Williams-Yuen 2020 | 'You're Not Just a Medical Professional': Exploring Paramedic Experiences of Overdose Response Within Vancouver's Downtown Eastside.                             | Yes | Healthy Professionals                  | Social responsiveness, justice, equity and access |
| Wingrove 2015      | The International Roots of Community Paramedicine.                                                                                                               | No  | Evidence informed practice and systems |                                                   |
| Wong 2012          | Job Strain and Shift Work Influences on Biomarkers And subclinical Heart Disease Indicators: A Pilot Study                                                       | Yes | Healthy Professionals                  |                                                   |

Emerging concepts in the paramedicine literature to inform the revision of a pan-Canadian competency framework for paramedics: a restricted review

|            |                                                                                                             |     |                                                   |                                        |
|------------|-------------------------------------------------------------------------------------------------------------|-----|---------------------------------------------------|----------------------------------------|
| Xi 2021    | Paramedics Working in General Practice: A Scoping Review                                                    | Yes | Complex adaptive systems                          |                                        |
| Xie 2021   | Economic Analysis of Mobile Integrated Health Care Delivered by Emergency Medical Services Paramedic Teams. | Yes | Evidence informed practice and systems            |                                        |
| Young 2015 | Paramedic Chiefs of Canada's National Mentoring Program.                                                    | No  | Adaptive expertise                                |                                        |
| Young 2018 | Psychological Health and Safety in The Paramedic Service Organization: A Look at The New Standard           | No  | Healthy Professionals                             |                                        |
| Young 2019 | Patient Transportation in Canada's Northern Territories: Patterns, Costs and Providers' Perspectives.       | Yes | Social responsiveness, justice, equity and access | Evidence informed practice and systems |
| Yung 2021  | Developing A Canadian Fatigue Risk Management Standard for First Responders: Defining the Scope             | Yes | Healthy Professionals                             |                                        |
